# Supplementary material for: Evaluate the guide RNA effectiveness via Agrobacterium-mediated transient assays in Nicotiana benthamiana
Source: PubMed Central journal article supplement (PMC9986745; doi:10.3389/fpls.2023.1111683), 2023-02-20

**Figure S1. The nucleotide sequences of *NbEDS1a*, *NbEDS1b*, and *NbNDR1*.** The guide RNA binding sequence is highlighted in yellow; the PAM sites are highlighted in blue. The start and stop codons of *NbEDS1* and *NbNDR1* genes are in red.

```

NbDES1a 1 ATGGTGAGAATTGAAGAGGGGAGAGAAGTGAAGATGAGCTGATCAAGAAAGCTTGTAACTTAGCAATGGAAGCTCACAGTTTGTCTTCTGGGAGCCCTTATATTTTCAAGAAAAAAGT
NbEDS1b 1 ATGGTGAGAATTGAAGAGGGGAGAGAAGTGAAGATGAGCTGATCAAGAAAGCTTGTAACTTAGCAATGGAAGCTCACAGTTTGTCTTCTGGGAGCCCTTATATTTTCAAGAAAAAAGT

NbDES1a 121 GGATCGATGGATGTTTTTTGGCTTTTGGCTGSAAAATGGTCTGTGATGGT TGGTACAGTTGTAGCACTTCTTTTGGAGAGAAAAATCTTCGTTCCATCATTGAAAAGTGTGGCACA
NbEDS1b 121 GGATCGATGGATGTTTTTTGGCTTTTGGCTGSAAAATGGTCTGTGATGGT TGGTACAGTTGTAGCACTTCTTTTGGAGAGAAAAATCTTCGTTCCATCATTGAAAAGTGTGGCACA

NbDES1a 241 GATGAGGTAGCCATGGTTAATGAAGCATTGTCTAGCAGATTTGAACACATATTGAACAACCTCTCTCTTAAAAATGAGGTACTGTGTTTGATAATCTTGTTCCTTTCTCTCTTTTTT
NbEDS1b 241 GATGAGGTAGCCATGGTTAATGAAGCATTGTCTAGCAGATTTGAACACATATTGAACAACCTCTCTCTTAAAAATGAGGTACTGTGTTTGATAATCTTGTTCCTTTCTCTCTTTTTT

NbDES1a 361 GGGTGGTATTTTGTTCGTTTTGGTGGTATTAATGTTTAACTCCGTGCACGTGACAATGTACAGTAGCAAATTAAGTGACTTGAACAACAGTGTATAACAATTTAGACTATAGTGA
NbEDS1b 361 GGGTGGTATTTTGTTCGTTTTGGTGGTATTAATGTTTAACTCCGTGCACGTGACAATGTACAGTAGCAAATTAAGTGACTTGAACAACAGTGTATAACAATTTAGACTATAGTGA

NbDES1a 481 CAATGTTAGAAATCTGTACACTGTCTTAAATATGATAATTAGTTACCTAAATAGGAAGTGAATGTGGAAAAAGATTCAATTTTTTCATTTTGGAGTGGGTTTTGAAGGGGGACAGT
NbEDS1b 481 CAATGTTAGAAATCTGTACACTGTCTTAAATATGATAATTAGTTACCTAAATAGGAAGTGAATGTGGAAAAAGATTCAATTTTTTCATTTTGGAGTGGGTTTTGAAGGGGGACAGT

NbDES1a 601 TCCAGAATGGATTAGCACATAGATTGAATATTGCCTCGTCTTTTTTAGACAAAGGTTTTACAGCTGAGTGTAAACCTGTCCCCAAAAAATCTTCTTGGTGTATAGAACTGATGTG
NbEDS1b 601 TCCAGAATGGATTAGCACATAGATTGAATATTGCCTCGTCTTTTTTAGACAAAGGTTTTACAGCTGAGTGTAAACCTGTCCCCAAAAAATCTTCTTGGTGTATAGAACTGATGTG

NbDES1a 721 AGTATTAGTTTTTATGCTCGTCTCCGGGAGAGACGATGCAATCTTTGTGTAACGGTTCAACTAAACTCAATATTTTTGACACATATATATATTAGAAGTACAATGAATTCAGTCTA
NbEDS1b 721 AGTATTAGTTTTTATGCTCGTCTCCGGGAGAGACGATGCAATCTTTGTGTAACGGTTCAACTAAACTCAATATTTTTGACACATATATATATTAGAAGTACAATGAATTCAGTCTA

NbDES1a 841 AAAACCTTAAAGTTAAATCAATCATGTTTAAATCCTAAATCCTCCTCCTCCCGGAGCAGCTTTGTCAATTTCAACAATGGAAGACAGAGAGGTTATACTCAGCGTCAAGAAGTCC
NbEDS1b 841 AAAACCTTAAAGTTAAATCAATCATGTTTAAATCCTAAATCCTCCTCCTCCCGGAGCAGCTTTGTCAATTTCAACAATGGAAGACAGAGAGGTTATACTCAGCGTCAAGAAGTCC

NbDES1a 961 ACTCCTGACAATATCATGCTGATCTAGCTAACTTAATTCCTCTTTATTAGCTCTTAGTTATCAAATCTTCATGTCCAAGAATATTTTCCAAGTCAAACAAAACCGATTCCTATCAA
NbEDS1b 961 ACTCCTGACAATATCATGCTGATCTAGCTAACTTAATTCCTCTTTATTAGCTCTTAGTTATCAAATCTTCATGTCCAAGAATATTTTCCAAGTCAAACAAAACCGATTCCTATCAA

NbDES1a 1081 ATATTCTTCAAGATGATTCCTCTTTAGACTAACAAAGATTAACCTTCATAGCTTCATCTTTAATTTGGAACTGAATGTTGATTTCATGGGAAGTGTTCGTTATAGTGGAGAAGCGGATG
NbEDS1b 1081 ATATTCTTCAAGATGATTCCTCTTTAGACTAACAAAGATTAACCTTCATAGCTTCATCTTTAATTTGGAACTGAATGTTGATTTCATGGGAAGTGTTCGTTATAGTGGAGAAGCGGATG

NbDES1a 1201 TCAGAAGGAAAACAGATAGTGTTCAGGGCCTCGTCCGGTGGCCCTATTGCGATTTTGGCAGCCCTATGTGTCTAGAACATTGTTGCAAGCAAGCAAAATGACAACCTGGTTTTGTCCA
NbEDS1b 1201 TCAGAAGGAAAACAGATAGTGTTCAGGGCCTCGTCCGGTGGCCCTATTGCGATTTTGGCAGCCCTATGTGTCTAGAACATTGTTGCAAGCAAGCAAAATGACAACCTGGTTTTGTCCA

NbDES1a 1321 TACTGTATAACTTTTGGATGCCCTCTTGTGGTGGACAGAATATGGTCTCATGCCCTCATGCCGAAAACTGGGCTCGTTACTTCATACATTTTGTACGAAAATATGATATCGTTCCCTCGG
NbEDS1b 1321 TACTGTATAACTTTTGGATGCCCTCTTGTGGTGGACAGAATATGGTCTCATGCCCTCATGCCGAAAACTGGGCTCGTTACTTCATACATTTTGTACGAAAATATGATATCGTTCCCTCGG

NbDES1a 1441 ATGATGCTTGCTCCCTTTTCATCGATTCAAGAATGGCTTCAAGCAATCTTTGACTTCATCAATCCAAAATCCCGAATTATCAGCACGAGGTAGTTGTAAGATCATATGATGCATCGAAG
NbEDS1b 1441 ATGATGCTTGCTCCCTTTTCATCGATTCAAGAATGGCTTCAAGCAATCTTTGACTTCATCAATCCAAAATCCCGAATTATCAGCACGAGGTAGTTGTAAGATCATATGATGCATCGAAG

```

NbDES1a 1561 AATTTCTTTATGACTGTAATGAGGAGTGCATCCCTCTGTGCAAGTTATGCTGCATGTAATCTGAAAGGATGCACAACTTGTGTAGAAACAGTTTCTAACATTGTTCAACTCAGCCCT

NbEDS1b 1561 AATTTCTTTATGACTGTAATGAGGAGTGCATCCCTCTGTGCAAGTTATGCTGCATGTAATCTGAAAGGATGCACAACTTGTGTAGAAACAGTTTCTAACATTGTTCAACTCAGCCCT

NbDES1a 1681 TATAGACCTTTTGGAACTTACATCTTCTGCACTGGAATGGGAACTGGTGGTCTGTGAGAATCCAGATGCTGTTCTGCAGTTACTGTTCTATTGTGCTCAAAATGAGTCCGAAACAGAA

NbEDS1b 1681 TATAGACCTTTTGGAACTTACATCTTCTGCACTGGAATGGGAACTGGTGGTCTGTGAGAATCCAGATGCTGTTCTGCAGTTACTGTTCTATTGTGCTCAAAATGAGTCCGAAACAGAA

NbDES1a 1801 GTTGAAGAAGTTGTTACCAGAAGCTTAAACGAACATTTGTTATATAGAAAAGAAATGCAGGAAAGCTTAGAGATGCAGGATGTGGTTCATCTCAATAATCTTACCAGATATCCCTTGCTCT

NbEDS1b 1801 GTTGAAGAAGTTGTTACCAGAAGCTTAAACGAACATTTGTTATATAGAAAAGAAATGCAGGAAAGCTTAGAGATGCAGGATGTGGTTCATCTCAATAATCTTACCAGATATCCCTTGCTCT

NbDES1a 1921 TCAATGCCATTGCATTAGCTAGTGTGATGAAGTGGTAACGATGAATTTAGCCCTGAATGACTTAGCCCTGGTAAGTATAAATGTGTTGCTCTTTGCTGCTGATTTTACATTTAGCTCAA

NbEDS1b 1921 TCAATGCCATTGCATTAGCTAGTGTGATGAAGTGGTAACGATGAATTTAGCCCTGAATGACTTAGCCCTGGTAAGTATAAATGTGTTGCTCTTTGCTGCTGATTTTACATTTAGCTCAA

NbDES1a 2041 AGTAACGGGTTTCTTTTTCACGTTACAGAGTACAAGAGCACGGTTGTGCTCTGTGCAGCAGGACAATGGGAGAAGCAGAAAAGGAAGAACGAGGAAAAGATTGATGTAATAAGAACAG

NbEDS1b 2041 AGTAACGGGTTTCTTTTTCACGTTACAGAGTACAAGAGCACGGTTGTGCTCTGTGCAGCAGGACAATGGGAGAAGCAGAAAAGGAAGAACGAGGAAAAGATTGATGTAATAAGAACAG

NbDES1a 2161 CATCATGGAAGGATTAAGCAAGATACAGGAGTACCAGACCAAGTGTGATATTCAGAAAGTCGGGTATTATGATGCGTTCAAGCTTCAAGAGACCATCGATGACTTCAATGCTAATGTGAA

NbEDS1b 2161 CATCATGGAAGGATTAAGCAAGATACAGGAGTACCAGACCAAGTGTGATATTCAGAAAGTCGGGTATTATGATGCGTTCAAGCTTCAAGAGACCATCGATGACTTCAATGCTAATGTGAA

NbDES1a 2281 AAGGCTGGAGCTAGCAGGAATATGGGACGAAATCATTGAAATGTTGAAAAGTATGAGCTCCAGATAGTTTGGAGGAAGAAAGGAATGGATAAACTAGGGACGCAGTTCCGCAGGCA

NbEDS1b 2281 AAGGCTGGAGCTAGCAGGAATATGGGACGAAATCATTGAAATGTTGAAAAGTATGAGCTCCAGATAGTTTGGAGGAAGAAAGGAATGGATAAACTAGGGACGCAGTTCCGCAGGCA

NbDES1a 2401 AGTTGAGCCCTTGGATATTGCAAACTATTACAGCCATTTGAAGAATGAAGATACAGGACCTTACATGATCAGGGCTAGGCCGAAGCCTTATAGGTTACACAAACGATGGTTAGAGCATGA

NbEDS1b 2401 AGTTGAGCCCTTGGATATTGCAAACTATTACAGCCATTTGAAGAATGAAGATACAGGACCTTACATGATCAGGGCTAGGCCGAAGCCTTATAGGTTACACAAACGATGGTTAGAGCATGA

NbDES1a 2521 AGAGAGGGTGCAAAACAGTGAACGCTCTGAGTCTTGTGTTTTGGGCGAAGTGGAGGAACTAAGAAACAAGCCAAATTATGGAAGTGCAAAACAGGATTTTGAGTTTGAAAACAAGGCATG

NbEDS1b 2521 AGAGAGGGTGCAAAACAGTGAACGCTCTGAGTCTTGTGTTTTGGGCGAAGTGGAGGAACTAAGAAACAAGCCAAATTATGGAAGTGCAAAACAGGATTTTGAGTTTGAAAACAAGGCATG

NbDES1a 2641 GGATTTGCTCCAGAGTGGCCTTCTGGCGATGATGTTTTCTCCCTGAGTCTACCTTTACCAAATGGTGGAAACAACCTCCCTACTCAGCACAGAATGACATCTTGGATATCAGGAAAGT

NbEDS1b 2641 GGATTTGCTCCAGAGTGGCCTTCTGGCGATGATGTTTTCTCCCTGAGTCTACCTTTACCAAATGGTGGAAACAACCTCCCTACTCAGCACAGAATGACATCTTGGATATCAGGAAAGT

NbDES1a 2761 AAATTCTTAG

NbEDS1b 2761 AAATTCTTAG

> *Nicotiana benthamiana* cDNA sequence of *NbNDR1*

TGAAAATAGACTAACCATAACTTGAGTAAGAAATGAATATTTTGGACAAAAATAACACGCTCAATTTACATAGATAGCGTAAAAGAATTTACACTATCAAATAAATACACTCCCTCTATTCTA

TTTTTAAAGCATTATTTCTTTTATTTGCTATTCCCAAAAAATCCAGTTCTATTTTTAAACTAATAAAATACGAAATCTCACTTTATCTCAAATGATAAATTTTTATAATTATATAAA

TATTTTTCTTTTTAACCCCTAACACACAAAACCGCCACCTAGACTCCTTTTTTATTGGCTAGTTGACGTTGACCCCTTGTCATTGACTTGAAGTCAACCAAGATTTTAATTGGCGCTC

ACTTACCAATTACCAGAAATTCATAGGGCTGCTGCTGCTTACATACTCAATTTACTAGCACTTCCCTCAAAGCAGAAAGAAAACAAAAGCAGGACAGGACAAAAGTATAAATTGCC

CTATAGATCTTTTTATATAAACCCAAAGATTTTCTTTTCTCAACAACATATCTCAAGTTTCAATTTTGATCTACCTTTTATATATTTTCTATTTTTTTCAGATCTTTGAAAACCAATTTT

TTTCAACATGTCAGACTATGGATCCAATAATACATGCTGCTTTAAGTGCATCCAATTCATATTAACAGCAGCCTTAACAGCTCTTTTCATTTGGCTAAGTCTAAGAACCACAAAACCTCTTGC

TCTTTAGATAATTTTACTTACCTGCCCTTAAACAACCTGATAAATCCAACTCCACAAGTCCAATCATACTTTCTTTTACAGTCAATTTGAACAACAAGATGAAGGACAAAAGGTGTTGCTT

ACGATGACATTAACCTTAGTTTTTATTATGGTACAAATACAAGTTTCTCTATAGGTAATTATACAGTACCTGGCTTTTACCAAGGTCATGACAAGAAAGCACATAAAAAAGGTATACTGGAAC

TCAGAAAATGCCTTGAATGATGCTTTAAAGATGGTTTCAAATGGGTCATAAGTGGTTTTTCAGGGTGGATGTAGCTACTAGAGTCAGGTACAAGGTCATTCTTTGGTATACTAAGAGGCATAAT  
TTTACTGTGGAAAATAGTAAAGTAAAAGTGGATGGTTCAGGTAAATCAAGCGCACAGAAGCTTCATTGCTGTTTTATGACTTTTGGACTTCCCGAATGTTTTATTACCTTGCTTCTTTTGT  
TGTAAAGATTCCCTCGGGTATTCAAGATTTAAGCTTGATTAGTTCAGTTTTACAATTGCAGGTTTCAGGTTTTAGTATTTGGTAACATTCTAGTAATCTTTTAAATTATGTATCATTAAAAAAT  
GTTGGACTCAGTTGATTGCATGCTGTCGGTGCAAAGTACTGTAGTTGGTGAATCTTTTCTTTTGCATTTATTCTTTATAAAATTTTACTGGCTTGTCTTATGTGGTAGATCCTATGATCTT  
TTTTCTTGGATATCATTGTTTTTACTCATTCTATTTACTAGGTTAATAATTATTCATTTTCATATTGATAAGTGGCTATGAAAGAAGCGTGTTCCTATATTATGTTGTATTATTGATGTCACAGGC  
CTTATCTTTTCTGCTCTCCACCTTTCTTTTTAATGAGCCATATGGACTTTGGTCCACATTAATTAAGGGATAGTTTATGATTCTTTGCTTTCTGATGCCTTCTCAGGAGTATGATTTGT  
AGAATAATGCCCTCCAGATATATTCATCCAAGTGGTGTCTAATTAATTATTCCTATATAAAAAAAAAAGTAAAAGCATAGAATATAATCTTCGGGAATGGGTGTTCTTCTGATTTAGT  
ATTTTGAATAGCAACTTCAACAAAAAATTATATAATAATAAATAGACTTGATGGATAGGAATAAAATCTGATTCCTTTTAAAGGATTTAAATTAGAATTTTGGTTTTATCCTGAATCCTGAT  
AAAAAGAAGTGTAAAAAT

Figure S2

**A**

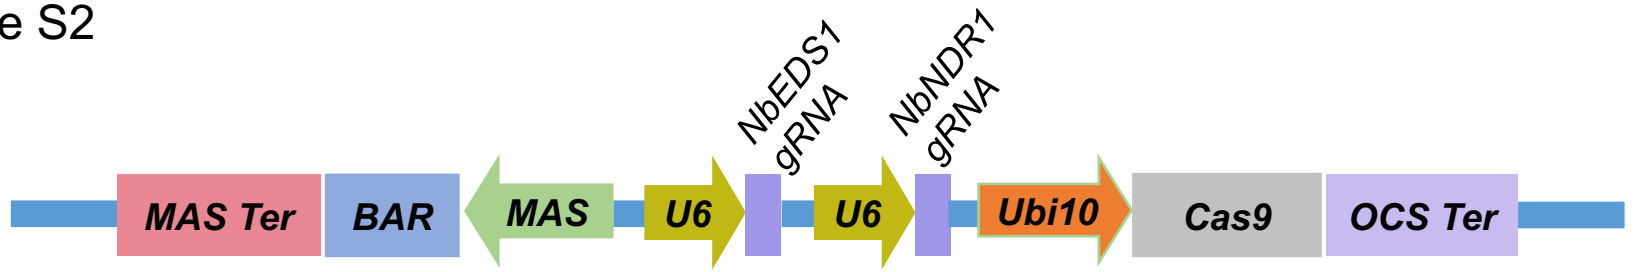

**B**

wt TTTTGCTGGAAATTGGTCTGTTGATG-GT**TGG**TACAGTTGTAGCACTTCTTTTGGAG  
 #15 TTTTGCTGGAAATTGGTCTGTTGATTGGT**TGG**TACAGTTGTAGCACTTCTTTTGGAG  
 #19 TTTTGCTGGAAATTGGTTTGTG---ATT**TGG**TACAGTTGTAGCACTTCTTTTGGAG

**C**

wt TTTAAGTGCATCCAATTCATATTAACAGC**AGG**CTTAACAGCTCTTTTCATTTGGCTA  
 #4 TTTAAGTGCATCCAATTCATATTAACAGC**AGG**CTTAACAGCTCTTTTCATTTGGCTA  
 #7 TTTAAGTGCATCCAATTCATATTAACAGC**AGG**CTTAACAGCTCTTTTCATTTGGCTA  
 #12 TTTAAGTGCATCCAATTCATATTAACAGC**AGG**CTTAACAGCTCTTTTCATTTGGCTA  
 #13 TTTAAGTGCATCCAATTCATATTAACAGC**AGG**CTTAACAGCTCTTTTCATTTGGCTA  
 #15 TTTAAGTGCATCCAATTCATATTAACAGC**AGG**CTTAACAGCTCTTTTCATTTGGCTA  
 #19 TTTAAGTGCATCCAATTCATATTAACAGC**AGG**CTTAACAGCTCTTTTCATTTGGCTA

**D**

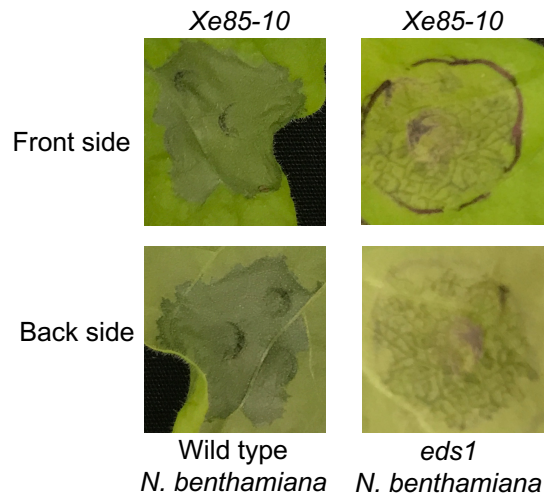

**E**

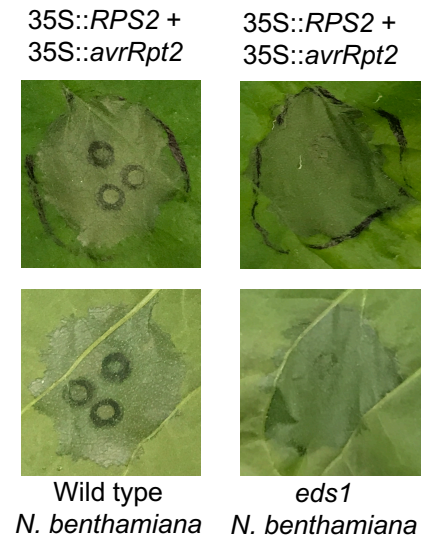



Figure S3

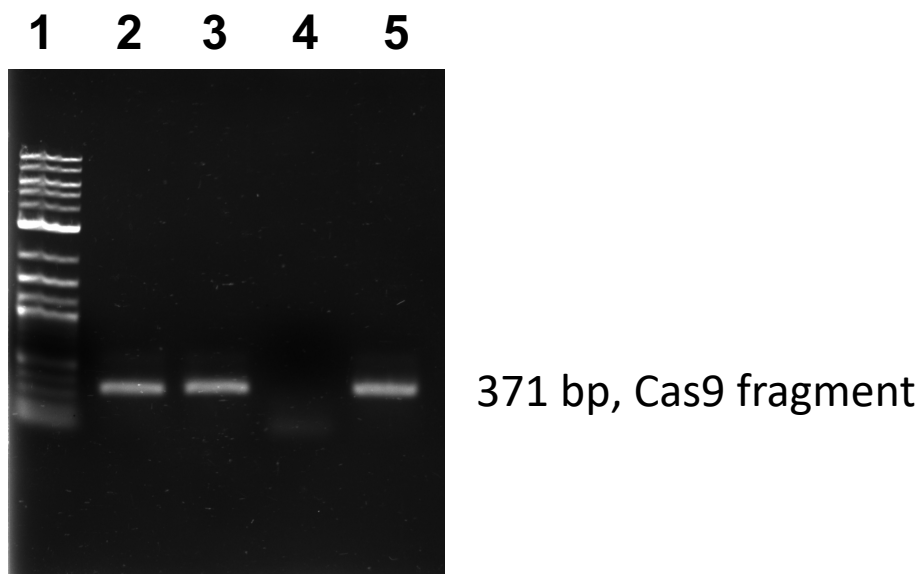

Supplement: Image_1.pdf [file Image_1.pdf]
